# Supplementary material for: Regional brain volume predicts response to methylphenidate treatment in individuals with ADHD
Source: Springer Nature journal article supplement (doi:10.1186/s12888-021-03040-5), 2021-01-11
Supplement: MOESM3 [file 18758268]

## The SNAP-IV Teacher and Parent Rating Scale

Date Completed: \_\_\_\_\_ / \_\_\_\_\_ / \_\_\_\_\_

Child ID: \_\_\_\_\_

Completed by: \_\_\_\_\_

Parent/Caregiver    Teacher    Other, specify \_\_\_\_\_

Read each item below carefully and check the column that represents your choice; do not mark between two choices. Please be sure to answer every item. In the past week have you noticed that the child...

|                                                                                                                                                              | Not<br>At All | Just A<br>Little | Quite<br>A Bit | Very<br>Much |
|--------------------------------------------------------------------------------------------------------------------------------------------------------------|---------------|------------------|----------------|--------------|
| 1. Fails to give close attention to details or makes careless mistakes in schoolwork or other activities                                                     | _____         | _____            | _____          | _____        |
| 2. Has difficulty sustaining attention in tasks or play activities                                                                                           | _____         | _____            | _____          | _____        |
| 3. Does not seem to listen to what is being said to him or her                                                                                               | _____         | _____            | _____          | _____        |
| 4. Does not follow through on instructions and fails to finish schoolwork or chores (not due to oppositional behavior or failure to understand instructions) | _____         | _____            | _____          | _____        |
| 5. Has difficulty organizing tasks and activities                                                                                                            | _____         | _____            | _____          | _____        |
| 6. Avoids, expresses reluctance about, or has difficulties engaging in tasks that require sustained mental effort (such as schoolwork or homework)           | _____         | _____            | _____          | _____        |
| 7. Loses things necessary for tasks or activities (eg, school assignments, pencils, books, tools, or toys)                                                   | _____         | _____            | _____          | _____        |
| 8. Is easily distracted by extraneous stimuli                                                                                                                | _____         | _____            | _____          | _____        |
| 9. Is forgetful in daily activities                                                                                                                          | _____         | _____            | _____          | _____        |
| 10. Fidgets with hands or feet or squirms in seat                                                                                                            | _____         | _____            | _____          | _____        |
| 11. Leaves seat in classroom or in other situations in which remaining seated is expected                                                                    | _____         | _____            | _____          | _____        |
| 12. Runs about or climbs excessively in situations where it is inappropriate                                                                                 | _____         | _____            | _____          | _____        |
| 13. Has difficulty playing or engaging in leisure activities quietly                                                                                         | _____         | _____            | _____          | _____        |
| 14. Is always "on the go" or acts as if "driven by a motor"                                                                                                  | _____         | _____            | _____          | _____        |
| 15. Talks excessively                                                                                                                                        | _____         | _____            | _____          | _____        |
| 16. Blurts out answers to questions before the questions have been completed                                                                                 | _____         | _____            | _____          | _____        |
| 17. Has difficulty waiting in lines or awaiting turn in games or group situations                                                                            | _____         | _____            | _____          | _____        |
| 18. Interrupts or intrudes on others (eg, butts into other's conversation or games)                                                                          | _____         | _____            | _____          | _____        |
| 19. Loses temper                                                                                                                                             | _____         | _____            | _____          | _____        |
| 20. Argues with adults                                                                                                                                       | _____         | _____            | _____          | _____        |
| 21. Actively defines or refuses adult requests or rules                                                                                                      | _____         | _____            | _____          | _____        |
| 22. Does things deliberately that annoy other people                                                                                                         | _____         | _____            | _____          | _____        |
| 23. Blames others for his or her mistakes or misbehavior                                                                                                     | _____         | _____            | _____          | _____        |
| 24. Is touchy or easily annoyed by others                                                                                                                    | _____         | _____            | _____          | _____        |
| 25. Is angry and resentful                                                                                                                                   | _____         | _____            | _____          | _____        |
| 26. Is spiteful or vindictive                                                                                                                                | _____         | _____            | _____          | _____        |

The mean of items 1-9 will be summarized for ADHD subset inattention symptoms and the mean of item 10-18 will be summarized for ADHD subset hyperactivity/impulsivity symptoms.  
The mean of items 19-26 will be summarized for ODD.
